# Supplementary material
Source: Springer Nature journal article supplement (https://www.springermedizin.de/resource/supplementary/12885_2013_4454_MOESM6_ESM.pdf/9466454)

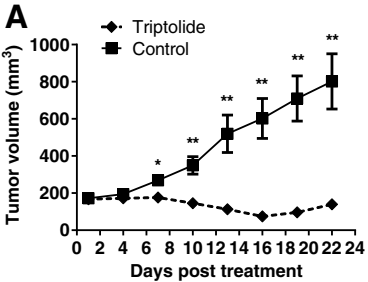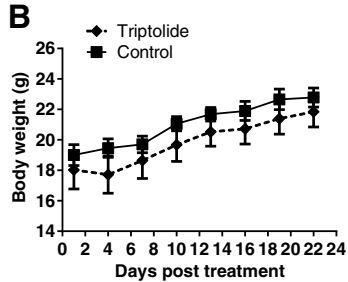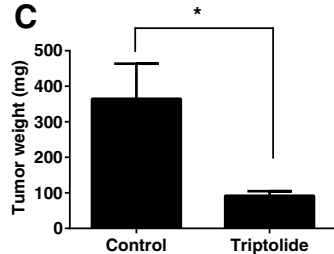

**D**

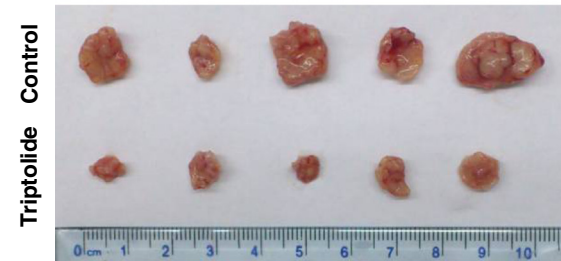

**E**

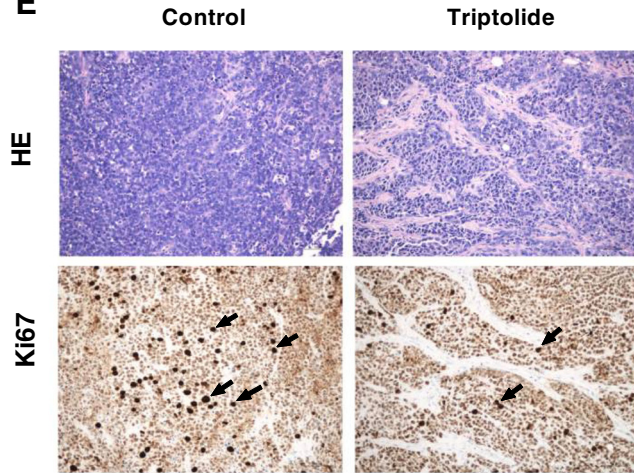

Supplement: MOESM6 [file 9466454]
